# Supplementary material for: Post-Translational Modifications of Cytochrome c in Cell Life and Disease
Source: PubMed Central journal article supplement (PMC7697256; doi:10.3390/ijms21228483), 2020-11-11
Supplement: ijms-21-08483-s001.pdf [file ijms-21-08483-s001.pdf]

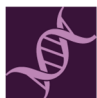

1 Review

## 2 Post-Translational Modifications of Cytochrome *c* in 3 Cell Life and Disease

4 Alejandra Guerra-Castellano <sup>1</sup>, Inmaculada Márquez <sup>1</sup>, Gonzalo Pérez-Mejías <sup>1</sup>, Antonio Díaz-  
5 Quintana <sup>1</sup>, Miguel A. De la Rosa <sup>1</sup> and Irene Díaz-Moreno <sup>1,\*</sup>

6 <sup>1</sup> Instituto de Investigaciones Químicas (IIQ), Centro de Investigaciones Científicas Isla de la Cartuja  
7 (cicCartuja), Universidad de Sevilla, Consejo Superior de Investigaciones Científicas (CSIC), Avda.,  
8 Américo Vespucio 49, Sevilla 41092, Spain

9 \* Correspondence: idiazmoreno@us.es

10 Received: date; Accepted: date; Published: date

11

### 12 Supplementary Materials

13

Table S1. Non-canonical amino acid

| Modified residues | Unnatural amino acid mimic                                                                                            | reference |
|-------------------|-----------------------------------------------------------------------------------------------------------------------|-----------|
|                   | 4'-carboxymethoxy-3'-phosphonophenylalanine                                                                           | [1]       |
|                   | N-[4-(2-{2-[3-(2-Bromo-acetyl-amino)-propionyl-amino]-3-hydroxy-propionyl-amino}-ethyl)-phenyl]-oxalamic acid         | [2]       |
|                   | 3-(4-{2-[2-(2-bromo-acetyl-amino)-ethyl-disulfanyl]-ethyl-carbamoyl}-cyclohexyl-carbamoyl)-pyrazine-2-carboxylic acid | [2]       |
| Phosphotyrosine   | Photocaged phosphotyrosine                                                                                            | [3]       |
|                   | Sulfotyrosine                                                                                                         | [4]       |
|                   | <i>p</i> -carboxymethyl-L-phenylalanine                                                                               | [5]       |
|                   | <i>p</i> -(phosphonoamino)-phenylalanine                                                                              | [6]       |
|                   | O-phosphotyrosine                                                                                                     | [7]       |
|                   | Benzyl 2-benzyloxycarbonylamino-3-[4-bis(dimethylamino)phosphoryloxyphenyl] propanoate                                | [8]       |
|                   | 4-phosphomethyl-L-phenylalanine                                                                                       | [9]       |
|                   | <i>p</i> -azido-L-phenylalanine                                                                                       | [10]      |
| Phosphothreonine  | Photocaged phosphothreonine                                                                                           | [3]       |
|                   | O-phospho-L-threonine                                                                                                 | [11]      |
| Phosphoserine     | Photocaged phosphoserine                                                                                              | [3]       |
|                   | Phosphonomethylene alanine                                                                                            | [12]      |
| Nitrotyrosine     | 3-nitrotyrosine                                                                                                       | [13]      |
| Acetyl-lysine     | <i>N</i> <sup>ε</sup> -acetyl-lysine                                                                                  | [14]      |
|                   | Trifluoroacetyl-lysine                                                                                                | [15]      |
|                   | 2-amino-8-oxononanoic                                                                                                 | [16]      |

14

15

16

17 **References**

- 18 1. Kawahata, N.; Yang, M.G.; Luke, G.P. A novel phosphotyrosine mimetic 4'-carboxymethoxy-3'-  
19 phosphonophenylalanine (Cpp): exploitation in the design of nonpeptide inhibitors of pp60(Src) SH2  
20 domain. *Bioorg Med Chem Lett* **2001**, *11*, 2319–2323.
- 21 2. Erlanson, D.A.; McDowell, R.S.; He, M.M. Discovery of a new phosphotyrosine mimetic for PTP1B using  
22 breakaway tethering. *J Am Chem Soc* **2003**, *125*, 5602–5603.
- 23 3. Rothman, D.M.; Petersson, E.J.; Vázquez, M.E. Caged phosphoproteins. *J Am Chem Soc* **2005**, *127*, 846–847.
- 24 4. Liu, C.C.; Schultz, P.G. Recombinant expression of selectively sulfated proteins in *Escherichia coli*. *Nat*  
25 *Biotechnol* **2006**, *24*, 1436–1440.
- 26 5. Xie, J.; Supekova, L.; Schultz, P.G. A genetically encoded metabolically stable analogue of phosphotyrosine  
27 in *Escherichia coli*. *ACS Chem Biol* **2007**, *2*, 474–478.
- 28 6. Serwa, R.; Wilkening, I.; Del Signore, G. Chemoselective Staudinger-phosphite reaction of azides for the  
29 phosphorylation of proteins. *Angew Chem Int Ed Engl* **2009**, *48*, 8234–8239.
- 30 7. Fan, C.; Ip, K.; Söll, D. Expanding the genetic code of *Escherichia coli* with phosphotyrosine. *FEBS Lett.* **2016**,  
31 *590m* 3040–3047.
- 32 8. Hoppmann, C.; Wong, A.; Yang, B. Site-specific incorporation of phosphotyrosine using an expanded  
33 genetic code. *Nat Chem Biol* **2017**, *13*, 842–844.
- 34 9. Luo, X.; Fu, G.; Wang, R.E. Genetically encoding phosphotyrosine and its nonhydrolyzable analog in  
35 bacteria. *Nat Chem Biol* **2017**, *13*, 845–849.
- 36 10. Chin, J. W.; Santoro, S. W.; Martin, A. B.; King, D. S.; Wang, L.; Schultz, P. G. Addition of *p*-azido-L-  
37 phenylalanine to the genetic code of *Escherichia coli*. *J Am Chem Soc* **2002**, *124*, 9026–9027.
- 38 11. Zhang, M.S.; Brunner, S.F.; Huguenin-Dezot, N. Biosynthesis and genetic encoding of phosphothreonine  
39 through parallel selection and deep sequencing. *Nat Methods* **2017**, *14*, 729–736.
- 40 12. Rogerson, D.T.; Sachdeva, A.; Wang, K. Efficient genetic encoding of phosphoserine and its nonhydrolyzable  
41 analog. *Nat Chem Biol* **2015**, *11*, 496–503.
- 42 13. Sokolovsky, M.; Riordan, J.F.; Vallee, B.L. Conversion of 3-nitrotyrosine to 3-aminotyrosine in peptides and  
43 proteins. *Biochem Biophys Res Commun* **1967**, *27*, 20–25.
- 44 14. Neumann H, Peak-Chew SY, Chin JW. Genetically encoding N(epsilon)-acetyl-lysine in recombinant  
45 proteins. *Nat Chem Biol* **2008**, *4*, :232-234.
- 46 15. Hancock, S. M.; Uprety, R.; Deiters, A.; Chin, J. W. Expanding the genetic code of yeast for incorporation of  
47 diverse unnatural amino acids via a pyrrolysyl-tRNA synthetase/tRNA pair. *J Am Chem Soc* **2010**, *132*, 14819–  
48 14824.
- 49 16. Huang, Y; Wan, W; Russell, W.K.; Pai, P. J.; Wang, Z.; Russell, D. H.; Liu, W. Genetic incorporation of an  
50 aliphatic keto-containing amino acid into proteins for their site-specific modifications. *Bioorg Med Chem Lett*  
51 **2010**, *20*, 878-880.
- 52

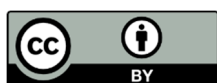

© 2020 by the authors. Submitted for possible open access publication under the terms and conditions of the Creative Commons Attribution (CC BY) license (<http://creativecommons.org/licenses/by/4.0/>).

53
